# Supplementary material for: Bioengineered ferritin-based LYTAC platform for tumor-targeted therapy
Source: Research Square preprint supplement (doi:10.21203/rs.3.rs-5515153/v1), 2025-02-26

**Supplementary Information**

**Bioengineered ferritin-based LYTAC platform for tumor-targeted therapy**

Shuai Zhang1,2,5, Yiliang Jin1,2,5, Yaxin Hou1, Guoheng Tang1, Zhuoran Wang1, XuehuiChen1✉, Xiyun Yan1,3,4✉, and Kelong Fan1,3,4✉

*1 CAS Engineering Laboratory for Nanozyme, Key Laboratory of Biomacromolecules (CAS), CAS Center for Excellence in Biomacromolecules, Institute of Biophysics, Chinese Academy of Sciences, Beijing 100101, China.*

*2 University of Chinese Academy of Sciences, Beijing 100049, China.*

*3 Nanozyme Medical Center, School of Basic Medical Sciences, Zhengzhou University, Zhengzhou, Henan 450052, China.*

*4 Nanozyme Laboratory in Zhongyuan, Henan Academy of Innovations in Medical Science, Zhengzhou, Henan, 451163, China.*

*5 These authors contributed equally: Shuai Zhang, Yiliang Jin.*

*✉email: fankelong@ibp.ac.cn; yanxy@ibp.ac.cn; chenxh@ibp.ac.cn*

**Supplementary Data Table 1: Summary of the maximal degradation of POI for each cell surface KineTAC target.**

| **POI** | **Cell Line** | **HFn-LYTAC platform** | **maximal degradation** |
| --- | --- | --- | --- |
| EGFR | U87 MG | HFn6-ZEGFR | 66.1 |
| wtHFn-ZEGFR | 44.6 |
| MDA-MB-231 | HFn6-ZEGFR | 70.4 |
| wtHFn-ZEGFR | 61.7 |
| HER2 | SKBR3 | HFn6-PEPHER2 | 84.8 |
| wtHFn-PEPHER2 | 73 |
| NCI-N87 | HFn6-PEPHER2 | 61.4 |
| wtHFn-PEPHER2 | 67.8 |
| PD-L1 | HT1080 | HFn6-FN3PD-L1 | 74.3 |
| wtHFn-FN3PD-L1 | 59 |
| MDA-MB-231 | HFn6-FN3PD-L1 | 61.4 |
| wtHFn-FN3PD-L1 | 53.7 |

**Supplementary Data Table 2: Protein sequences covered in the paper.**

|  | Amino Acid Sequence (N → C) |
| --- | --- |
| wtHFn | TTASTSQVRQNYHQDSEAAINRQINLELYASYVYLSMSYYFDRDDVALKNFAKYFLHQSHEEREHAEKLMKLQNQRGGRIFLQDIKKPDCDDWESGLNAMECALHLEKNVNQSLLELHKLATDKNDPHLCDFIETHYLNEQVKAIKELGDHVTNLRKMGAPESGLAEYLFDKHTLGDSDNES |
| HFn1  (D15L) | TTASTSQVRQNYHQLSEAAINRQINLELYASYVYLSMSYYFDRDDVALKNFAKYFLHQSHEEREHAEKLMKLQNQRGGRIFLQDIKKPDCDDWESGLNAMECALHLEKNVNQSLLELHKLATDKNDPHLCDFIETHYLNEQVKAIKELGDHVTNLRKMGAPESGLAEYLFDKHTLGDSDNES |
| HFn2 (F81Y) | TTASTSQVRQNYHQDSEAAINRQINLELYASYVYLSMSYYFDRDDVALKNFAKYFLHQSHEEREHAEKLMKLQNQRGGRIYLQDIKKPDCDDWESGLNAMECALHLEKNVNQSLLELHKLATDKNDPHLCDFIETHYLNEQVKAIKELGDHVTNLRKMGAPESGLAEYLFDKHTLGDSDNES |
| HFn3 (Q83H) | TTASTSQVRQNYHQDSEAAINRQINLELYASYVYLSMSYYFDRDDVALKNFAKYFLHQSHEEREHAEKLMKLQNQRGGRIFLHDIKKPDCDDWESGLNAMECALHLEKNVNQSLLELHKLATDKNDPHLCDFIETHYLNEQVKAIKELGDHVTNLRKMGAPESGLAEYLFDKHTLGDSDNES |
| HFn4 (N109R) | TTASTSQVRQNYHQDSEAAINRQINLELYASYVYLSMSYYFDRDDVALKNFAKYFLHQSHEEREHAEKLMKLQNQRGGRIFLQDIKKPDCDDWESGLNAMECALHLEKRVNQSLLELHKLATDKNDPHLCDFIETHYLNEQVKAIKELGDHVTNLRKMGAPESGLAEYLFDKHTLGDSDNES |
| HFn5 (D123E) | TTASTSQVRQNYHQDSEAAINRQINLELYASYVYLSMSYYFDRDDVALKNFAKYFLHQSHEEREHAEKLMKLQNQRGGRIFLQDIKKPDCDDWESGLNAMECALHLEKNVNQSLLELHKLATEKNDPHLCDFIETHYLNEQVKAIKELGDHVTNLRKMGAPESGLAEYLFDKHTLGDSDNES |
| HFn6 (N109R/K119R) | TTASTSQVRQNYHQDSEAAINRQINLELYASYVYLSMSYYFDRDDVALKNFAKYFLHQSHEEREHAEKLMKLQNQRGGRIFLQDIKKPDCDDWESGLNAMECALHLEKRVNQSLLELHRLATDKNDPHLCDFIETHYLNEQVKAIKELGDHVTNLRKMGAPESGLAEYLFDKHTLGDSDNES |
| wtHFnSpyTag | TTASTSQVRQNYHQDSEAAINRQINLELYASYVYLSMSYYFDRDDVALKNFAKYFLHQSHEEREHAEKLMKLQNQRGGRIFLQDIKKPDCDDWESGLNAMECALHLEKNVNQSLLELHKLATDKNDPHLCDFIETHYLNEQVKAIKELGDHVTNLRKMGAGGSGGGSGGAHIVMVDAYKPTK |
| HFn6SpyTag | TTASTSQVRQNYHQDSEAAINRQINLELYASYVYLSMSYYFDRDDVALKNFAKYFLHQSHEEREHAEKLMKLQNQRGGRIFLQDIKKPDCDDWESGLNAMECALHLEKRVNQSLLELHRLATDKNDPHLCDFIETHYLNEQVKAIKELGDHVTNLRKMGAGGSGGGSGGAHIVMVDAYKPTK |
| LFnSpyTag | SSQIRQNYSTDVEAAVNSLVNLYLQASYTYLSLGFYFDRDDVALEGVSHFFRELAEEKREGYERLLKMQNQRGGRALFQDIKKPAEDEWGKTPDAMKAAMALEKKLNQALLDLHALGSARTDPHLCDFLETHFLDEEVKLIKKMGDHLTNLHRLGGPGGSGGSGGAHIVMVDAYKPTK |
| pFnSpyTag | MLSERMLKALNDQLNRELYSAYLYFAMAAYFEDLGLEGFANWMKAQAEEEIGHALRFYNYIYDRNGRVELDEIPKPPKEWESPLKAFEAAYEHEKFISKSIYELAALAEEEKDYSTRAFLEWFINEQVEEEASVKKILDKLKFAKGGSGGGSGGAHIVMVDAYKPTK |
| FN3PD-L1- SpyCatcher | MASVSDVPRDLEVVAATPTSLTISWFYPLFYDARYYRITYGETGGNSPVQEFTVPGPSWATISGLKPGVDYTITVYAITDISTSRPISINYRTEIDKPSQGSAEAAAKEAAAKEAAAKEAAAKADSATHIKFSKRDEDGKELAGATMELRDSSGKTISTWISDGHVKDFYLYPGKYTFVETAAPDGYEVATPIEFTVNEDGQVTVDGEATEGDAHTLEHHHHHH |
| PEPHER2- SpyCatcher | MAEAKYAKEMRNAYWEIALLPNLTNQQKRAFIRKLYDDPSQSSELLSEAKKLNDSQGSECGGSAEAAAKEAAAKEAAAKEAAAKADSATHIKFSKRDEDGKELAGATMELRDSSGKTISTWISDGHVKDFYLYPGKYTFVETAAPDGYEVATPIEFTVNEDGQVTVDGEATEGDAHTLEHHHHHH |
| ZEGFR- SpyCatcher | MVDNKFNKEMWAAWEEIRNLPNLNGWQMTAFIASLVDDPSQSANLLAEAKKLNDAQAPKGSAEAAAKEAAAKEAAAKEAAAKADSATHIKFSKRDEDGKELAGATMELRDSSGKTISTWISDGHVKDFYLYPGKYTFVETAAPDGYEVATPIEFTVNEDGQVTVDGEATEGDAHTLEHHHHHH |

**Representative flow cytometry gating strategy: surface EGFR degradation in U87 MG cells.**


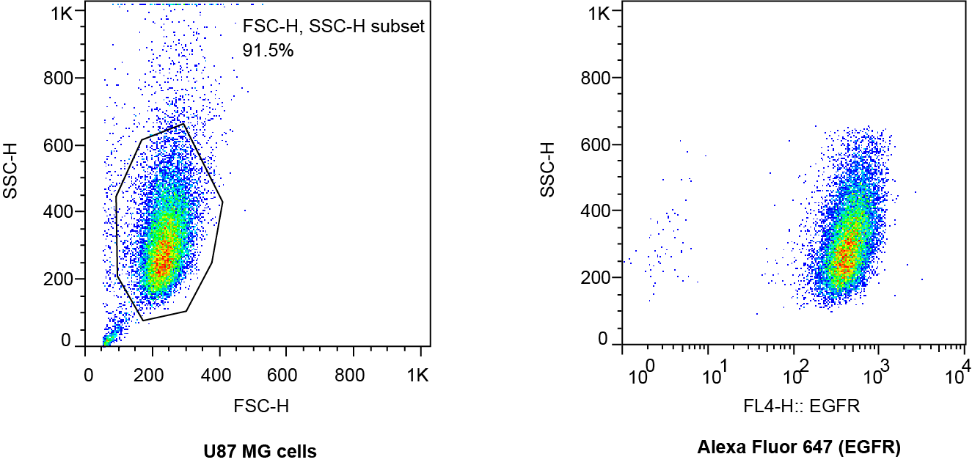

Supplement: Supplementary file 1 [file a0dc339ba70edcea95cf7168.docx]
